# Supplementary material
Source: Research Square preprint supplement (doi:10.21203/rs.3.rs-9913739/v1)
Supplement: Supplementary file 1 [file bb47c2d9a885f20482b4819f.pdf]

1  
2  
3  
4  
5  
6  
7  
8  
9  
10  
11  
12  
13  
14  
15  
16  
17  
18  
19  
20  
21

**Supplemental Information**  
**Chiral Selection of Purely Localized and Delocalized States in Non-Hermitian**  
**Photonic Waveguide Arrays**

Ruiqi Wang<sup>1</sup>, Yuliang Tang<sup>1</sup>, Qihuang Gong<sup>1, 2, 3, 4</sup>, and Yan Li<sup>1, 2, 3, 4, \*</sup>

<sup>1</sup>*State Key Laboratory for Mesoscopic Physics and Frontiers Science Center for Nano-optoelectronics, School of Physics, Peking University, Beijing 100871, China.*

<sup>2</sup>*Hefei National Laboratory, Hefei 230088, China.*

<sup>3</sup>*Collaborative Innovation Center of Extreme Optics, Shanxi University, Taiyuan, Shanxi 030006, China.*

<sup>4</sup>*Peking University Yangtze Delta Institute of Optoelectronics, Nantong 226010, China.*

\* Corresponding author: li@pku.edu.cn.

**Contents:**

- I. Chiral LDSS for  $k = 2$  and  $N > 3$
- II. Chiral LDSS for different  $(N, k)$
- III. The translation from the theoretical model to the experimental system
- IV. Optical field evolution in a practical EL encircling waveguide structure
- V. Realization of the  $(N, k) = (5, 3)$  case using a nine-waveguide system
- VI. Discussion of the efficiency discrepancy between simulation and experiment
- VII. Robustness against the deviation of  $\kappa$  and  $\gamma$

22 **Section I: Chiral LDSS for  $k = 2$  and  $N > 3$**

23 Here we consider the case  $k = 2$ ,  $N > 3$ . For  $N = 4, 5, 6$ , the imaginary parts of the  
 24 eigenenergy surfaces remain separated once the parameters evolve beyond the EPs (See Fig. S1).  
 25 Consequently, throughout the entire parameter space considered, the lowest-loss energy surface  
 26 remains associated with the same eigenenergy surface and does not undergo any surface exchange.  
 27 Under these conditions, chiral LDSS can be achieved between two states with distinct localization  
 28 characteristics via an appropriate encircling trajectory: one state is fully localized, while the other  
 29 exhibits a wavefunction extending over a limited number of waveguides.

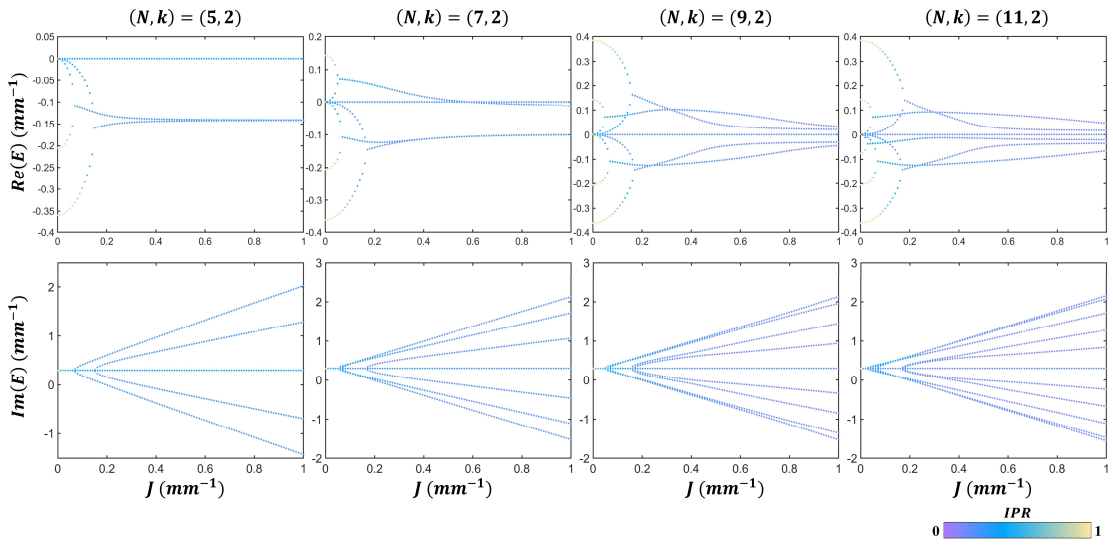

30  
 31 FIG. S1 Real and imaginary parts of the eigenvalue spectrum for different values of  $N$ . The other  
 32 parameters are fixed at  $\Delta = 0.2 \text{ mm}^{-1}$ ,  $\phi = 0.2\pi$ ,  $\gamma_q = \gamma_z = 0.2 \text{ mm}^{-1}$ ,  $k = 2$ .

33  
 34 We take  $N = 5$  as an illustrative example. The real and imaginary parts of the energy surfaces  
 35 are shown in Fig. S2(a), where the two EPs are marked by orange stars. The sky-blue surface  
 36 corresponds to the lowest-loss energy surface, and the  $IPR$  of its eigenstates is displayed in the  
 37 right panel. The encircling trajectory and the spatial distribution of  $\psi_1$  and  $\psi_2$  are shown in Fig.  
 38 S2(b). Regardless of the input, the output mode is always  $\psi_1$  ( $IPR_1 = 1$ ) for CW encircling  
 39 direction (Fig. S2(c)), and  $\psi_2$  ( $IPR_2 = 0.5$ ) for CCW encircling direction (Fig. S2(d)). The  
 40 normalized intensity dynamics under both local and uniform excitation (Fig. S2(e)) further confirm  
 41 that the encircling direction alone determines the final state.

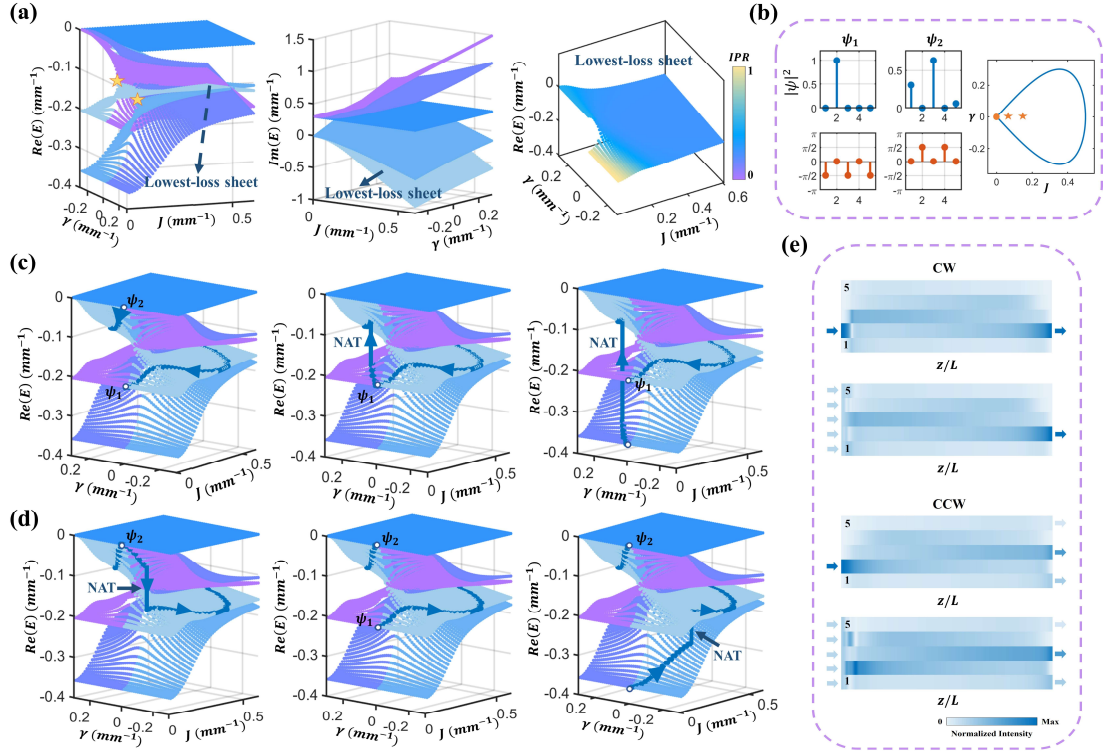

43

44 FIG. S2 Simulated results of the chiral LDSS for  $k = 2$  and  $N = 5$ . (a) The real and imaginary parts  
 45 of energy surfaces in the  $J - \gamma$  parameter space. The  $IPR$  of eigenstates on the lowest-loss energy  
 46 surface are calculated. (b) The encircling trajectory and the distribution of eigenstates at the starting point.  
 47 (c), (d) Mode conversion results for the CW (c) and CCW (d) encircling direction with input modes  $\psi_1$   
 48 and  $\psi_2$ . (e) The dynamics of the normalized intensity evolution at each site for CW (top) and CCW  
 49 (bottom) encircling processes.

50

51 For  $N \geq 7$ , some imaginary parts of the eigenenergy surfaces associated with different branches  
 52 become very close beyond the EPs and intersect for appropriate parameter values (see Fig. S1). As  
 53 a result, the identity of the lowest-loss energy surface can switch between different eigenenergy  
 54 surfaces across the parameter space. Figure S3(a) presents the real and imaginary parts of the energy  
 55 surfaces for  $N = 9$ . One observes that the imaginary part of the secondary lowest-loss (2LS) energy  
 56 surface is nearly indistinguishable from that of the lowest-loss one (1LS); in fact, the two correspond  
 57 to intersecting eigenenergy surfaces. This behavior is further revealed by the real parts: the identity  
 58 of the lowest-loss energy surface is associated with two distinct eigenenergy surfaces, depending on  
 59 the region of parameter space. We show that this property leads to enhanced selectivity for chiral  
 60 LDSS.

61 When the encircling trajectory approaches the critical parameter regime (gray-blue area) where  
62 the identity of the lowest-loss surface switches (e.g., the encircling trajectory shown in Fig. S3(b)),  
63 the chiral conversion occurs between distinct pairs of eigenstates:  $\psi_1$  ( $IPR_1 = 1$ ) and  $\psi_2$   
64 ( $IPR_2 = 0.521$ ), as well as  $\psi_3$  ( $IPR_3 = 1$ ) and  $\psi_4$  ( $IPR_4 = 0.530$ ). This behavior is enabled by  
65 the near-degeneracy in loss (imaginary part) of the eigenenergy surfaces occupied by these two pairs  
66 of states within this parameter range. Crucially, the initial excitation site determines which pair  
67 participates in the dynamics. For example, when site 1 is excited, the output mode is  $\psi_1$  for CW  
68 encircling and  $\psi_2$  for CCW encircling. When site 8 is excited, the output mode is  $\psi_3$  for CW  
69 encircling and  $\psi_4$  for CCW encircling. Thus, the output state is jointly controlled by the encircling  
70 direction and the excitation profile.

71 When the encircling trajectory remains well within the parameter regime preceding the switching  
72 area (as shown in Fig. 3(c)), the output mode for CW is always  $\psi_3$ . For CCW encircling, the output  
73 is predominantly  $\psi_4$ , although  $\psi_2$  may appear with a small probability depending on the initial  
74 excitation. This behavior arises because the eigenenergy branch hosting  $\psi_3$  and  $\psi_4$  constitutes  
75 the unambiguously dominant lowest-loss surface in this regime, and NATs subsequently drive the  
76 system to evolve stably on it.

77 When the encircling trajectory extends well beyond the critical switching position (see Fig. 3(d)),  
78 chiral conversion becomes confined to the pair  $\psi_1$  and  $\psi_2$ . This restriction arises because their  
79 eigenenergy surface emerges as the dominant lowest-loss branch over most of the parameter range.  
80 NATs drive the system onto this branch, where it subsequently evolves stably. Consequently, the  
81 output is universally determined by the encircling direction:  $\psi_1$  for CW encircling direction and  
82  $\psi_2$  for CCW encircling direction.

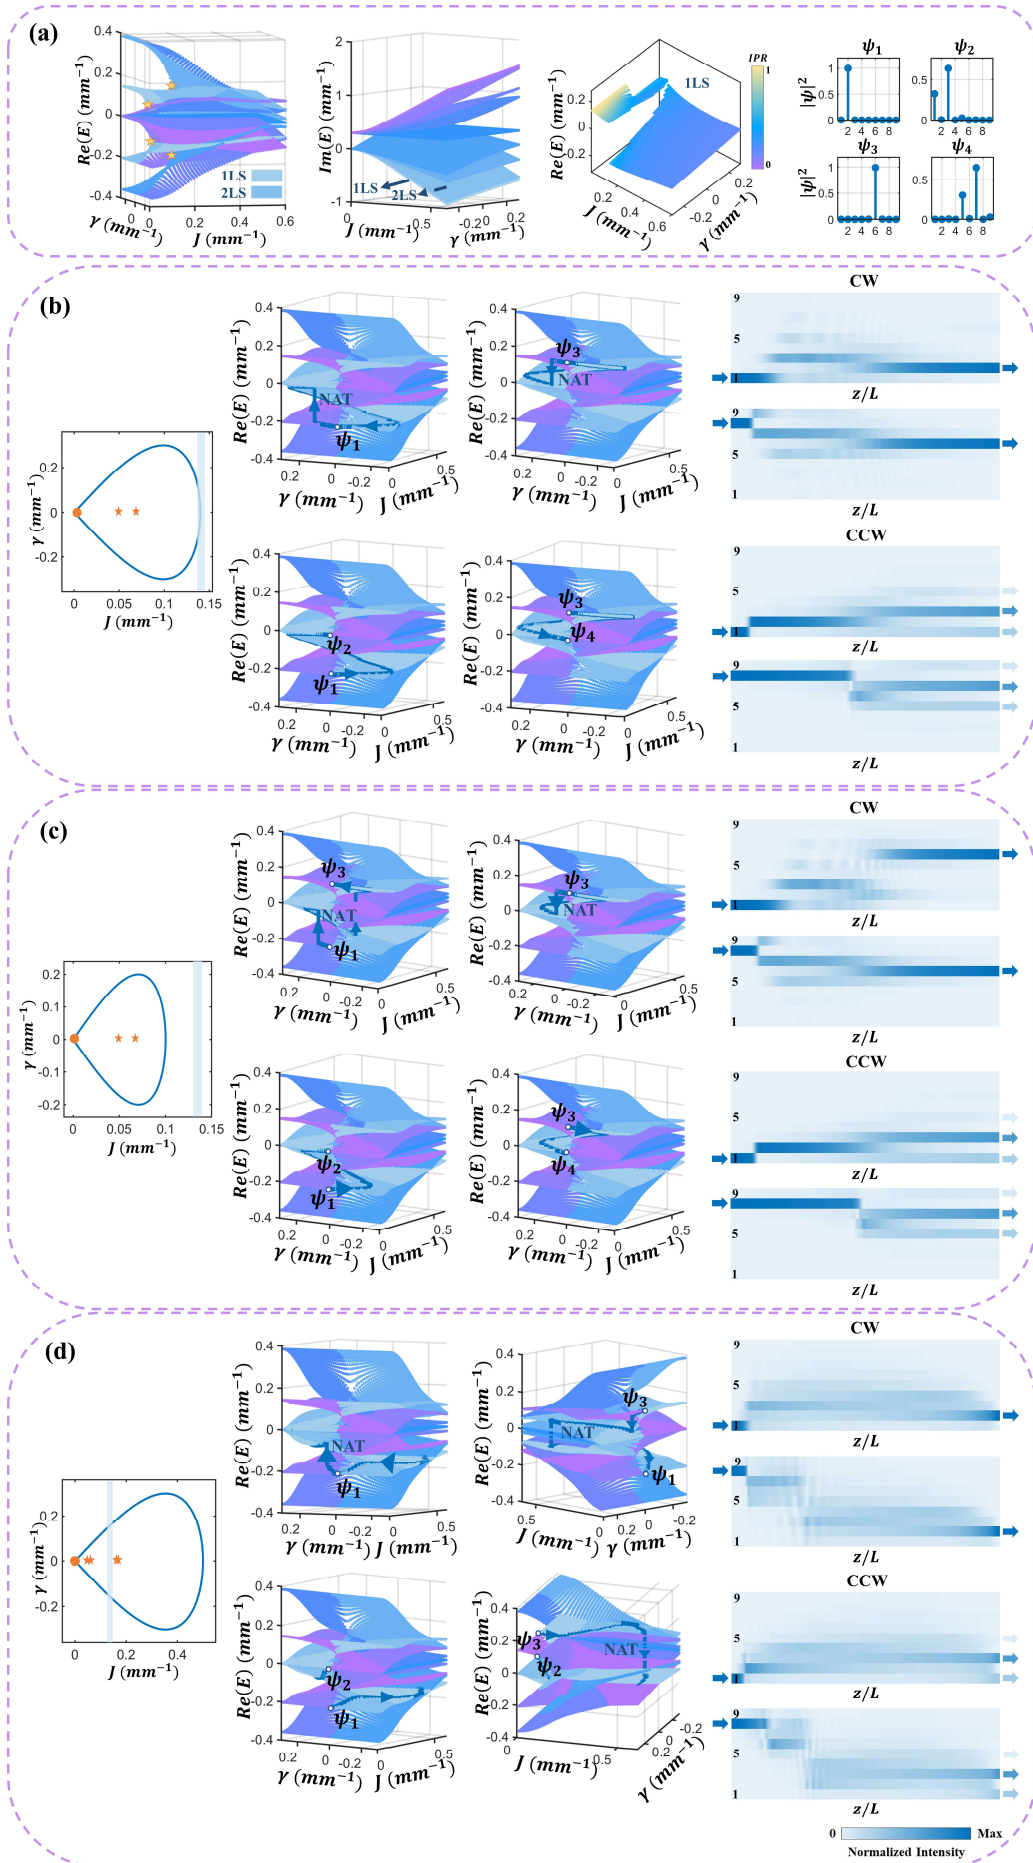

84 FIG. S3 Simulated results of the chiral LDSS for  $k = 2$  and  $N = 9$ . (a) The real and imaginary parts  
 85 of energy surfaces in the  $J - \gamma$  parameter space. The  $IPR$  of eigenstates on the lowest-loss energy  
 86 surface are calculated. The rightmost inset shows the distribution of eigenstates involved in the chiral  
 87 mode conversion. (b), (c), (d) Mode conversion for three encircling conditions relative to the critical  
 88 regime (gray-blue area). (b) Approaching, (c) before, and (d) beyond the critical regime. Left panels:  
 89 schematic of the encircling trajectories. Middle panels: state evolution for input state  $\psi_1$  and  $\psi_3$ .  
 90 Right panels: the dynamics of the normalized intensity evolution at each site when site 1 or site 8 is  
 91 excited.

### 93 Section II: Chiral LDSS for different $(N, k)$

94 For  $(N, k) = (13, 7)$ , we present the state evolution under different initial excitation conditions.  
 95 Figure S4 shows the normalized intensity dynamics for both CW and CCW encircling processes.

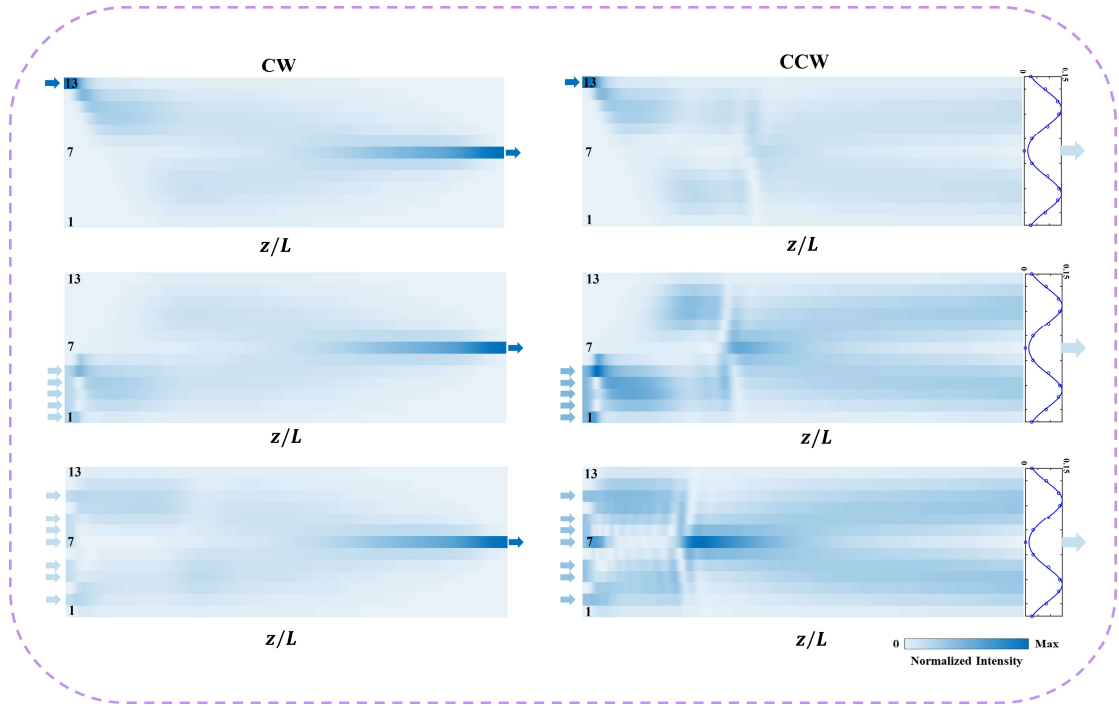

96  
 97 FIG. S4 Dynamics of the normalized intensity evolution for CW (left) and CCW (right) encircling  
 98 processes upon different initial excitations.

99  
 100 To demonstrate the universality of the chiral LDSS between the localized state  $\psi_L$  and the  
 101 delocalized state  $\psi_D$ , whose wavefunction follows a double-Gaussian distribution, we further  
 102 examine additional parameter combinations  $(N, k)$  satisfying  $k = (N + 1)/2$ . The corresponding

103 results are presented in Fig. S5.

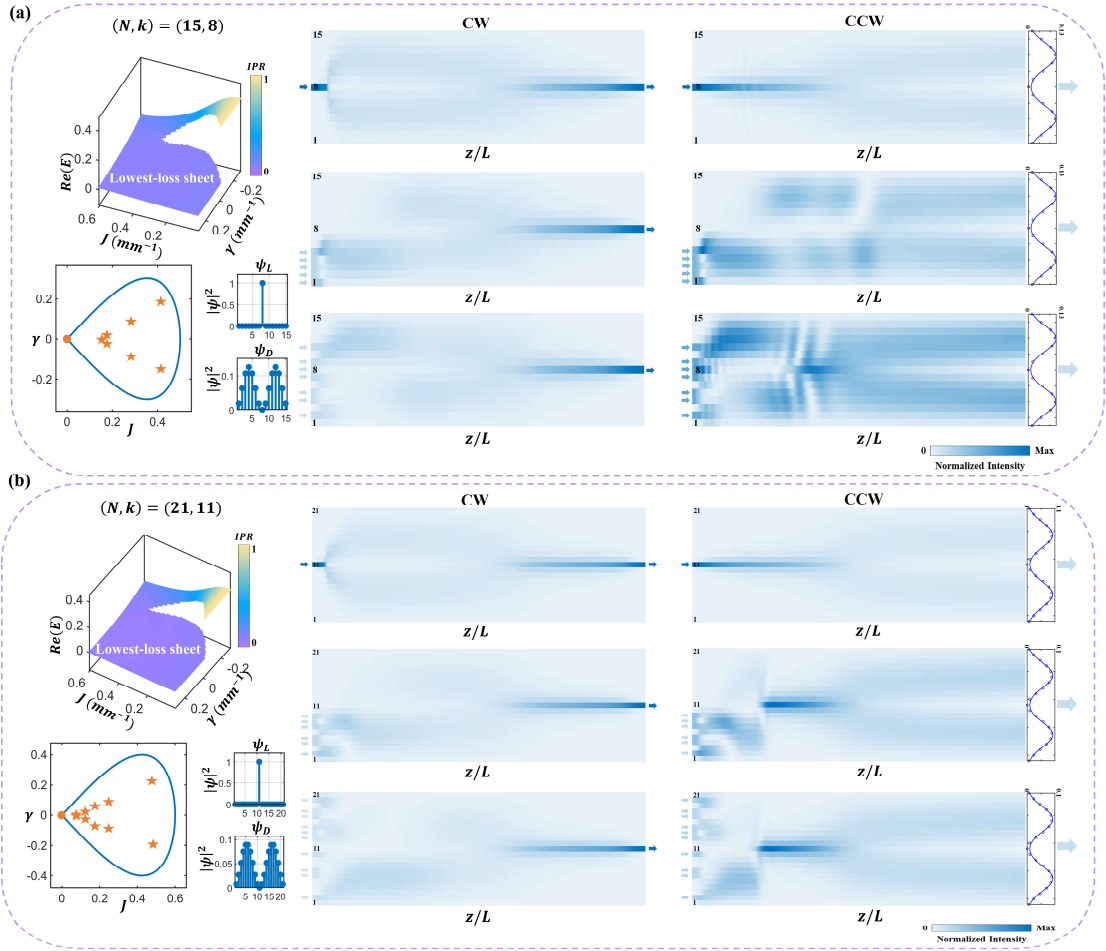

104  
 105 FIG. S5 Simulated results of the chiral LDSS for (a)  $(N, k) = (15, 8)$  and (b)  $(N, k) = (21, 11)$ . Left  
 106 panels: calculated  $IPR$  of the eigenstates on the lowest-loss energy surface, the encircling trajectory,  
 107 and the spatial distributions of  $\psi_L$  and  $\psi_D$ . Right panels: CW/CCW encircling dynamics (normalized  
 108 intensity) for different initial excitations.

109

### 110 Section III: The translation from the theoretical model to the experimental system

#### 111 (1) Equivalent process from $H_2$ to $H_1$

112 Here, we provide the rationale for using  $H_2$  as an effective equivalent of  $H_1$  in the main text.  
 113 We impose the conditions  $\beta_1 = \beta_5$  and  $\beta_2 = \beta_4$ , such that  $H_2$  becomes centrosymmetry. Under  
 114 these conditions,  $H_2$  can be partitioned into two  $3 \times 3$  blocks, as illustrated in Fig. S6(a). Under  
 115 the adiabatic elimination condition  $\gamma \gg |\kappa_{1,2}|$ , each block can be reduced to an effective  $2 \times 2$   
 116 Hamiltonian, which has been analyzed in detail within the coupled-mode theory framework<sup>1</sup>. If the  
 117 additional conditions  $\gamma \gg |\beta_2 - \beta_1|$  and  $\gamma \gg |\beta_2 - \beta_3|$  are satisfied, the Hamiltonian  $H_{eff}$  can

118 be obtained (Fig. S6(a)). By defining the effective parameters  $\beta = \beta_3 - \beta_1$ ,  $J = \frac{\kappa_1 \kappa_2}{\gamma}$ ,  $\gamma_z = \frac{\kappa_1^2}{\gamma}$  and  
 119  $\gamma_q = \frac{\kappa_2^2}{\gamma}$ , we finally recover the Hamiltonian  $H_1$ . Figure S6(b) illustrates the simulated mode  
 120 conversion processes based on  $H_2$ . For the CW encircling processes, the dynamic evolution  
 121 consistently directs light to a single output port WG3, regardless of the input excitation. For the  
 122 CCW encircling processes, light is output exclusively and equally from WG1 and WG5. The chiral  
 123 transmission efficiency, defined as the maximum transmittance across all conversion processes, is  
 124 24.7% (Fig. S6(c)).

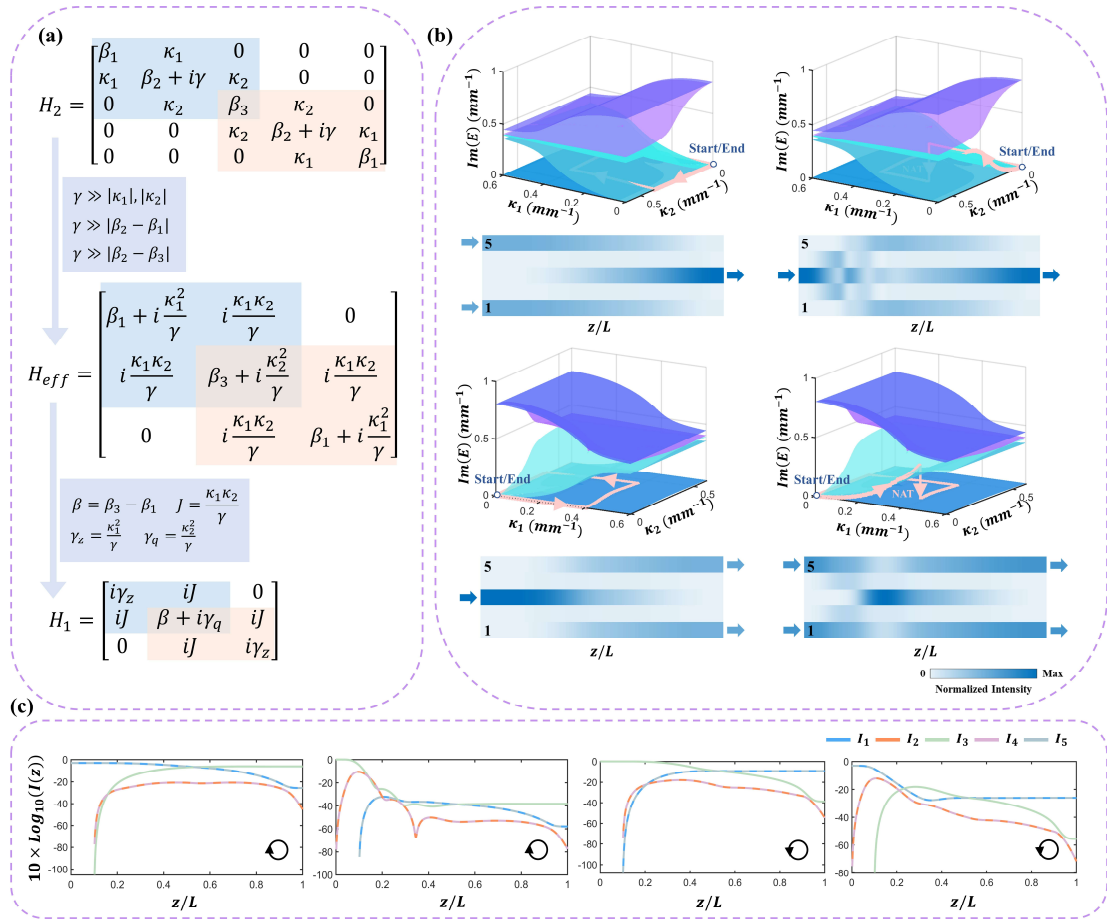

125  
 126 FIG. S6 (a) Equivalent process from  $H_2$  to  $H_1$ . (b) The simulated mode conversion processes for CW  
 127 (top) and CCW (bottom) encircling directions based on  $H_2$ . The encircling trajectory is identical to that  
 128 shown in Fig. 4(b) of the main text. The other parameters are set as  $\beta_1 = 0$ ,  $\beta_2 = 0.103 \text{ mm}^{-1}$ ,  $\beta_3 =$   
 129  $0.206 \text{ mm}^{-1}$ ,  $\gamma = 0.8 \text{ mm}^{-1}$ ,  $L = 50 \text{ mm}$ . Here, the values of  $\beta = \beta_3 - \beta_1$  are chosen according to  
 130 the quasiperiodic modulation formula  $\beta = 2\Delta \cos(4\pi b + \phi)$ , while  $\gamma$  is selected to satisfy the  
 131 adiabatic elimination condition  $\gamma \gg |\kappa_{1,2}|$ . (c) Calculation results of the intensity distribution during  
 132 evolution for CW and CCW encircling directions. The total input intensity is normalized to unity, and

133 for the simultaneous excitation of WG1 and WG5, each waveguide carries half of the total input intensity.

134

135 **(2) Achieving high transmission efficiency based on  $H_3$**

136 Figure S7(a) presents the simulation results of chiral mode conversion based on  $H_3$ . The relative  
 137 distribution of the output light intensity agrees well with that obtained from  $H_2$ , while the  
 138 transmission efficiency is markedly improved, reaching 78.1% compared with the low-efficiency  
 139 case discussed above (Fig. S7(b)). This enhancement arises because the path-dependent loss is  
 140 largely suppressed, since the imaginary part of the system's lowest-loss energy surface is equal to  
 141 zero. This efficiency can be further improved toward unity by increasing either the total evolution  
 142 length  $L$  or the maximum coupling coefficient  $\kappa_{max}$  along the trajectory, as shown in Fig. S7(c)  
 143 ( $L = 50$  mm,  $\kappa_{max} = 0.4$  mm<sup>-1</sup> in the main text).

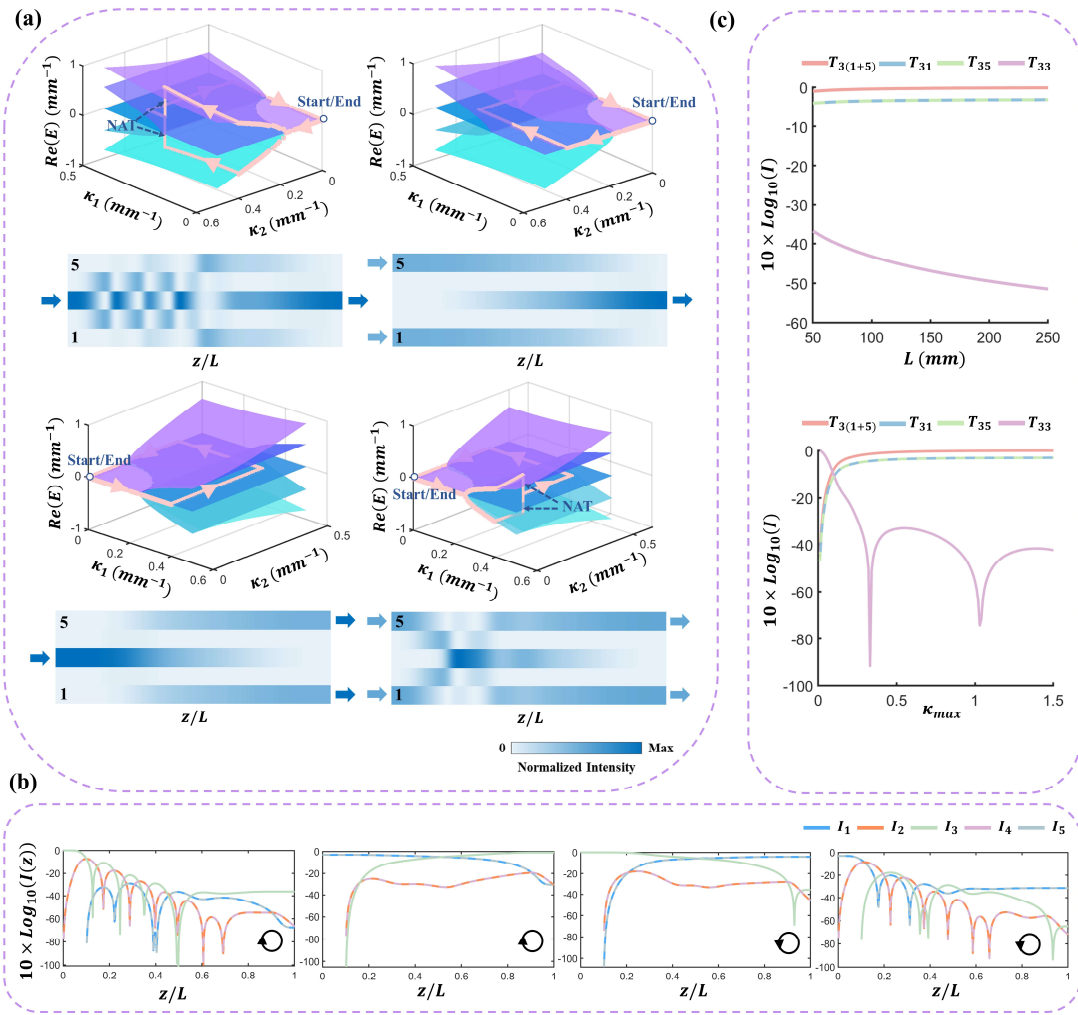

144

145 FIG. S7 (a) Mode conversion for CW (top) and CCW (bottom) encircling directions, simulated using the

146 EL encircling approach ( $L = 50$  mm). (b) Calculation results of the intensity distribution during

147 evolution for CW and CCW encircling directions. The total input intensity is normalized to unity, and  
148 for the simultaneous excitation of WG1 and WG5, each waveguide carries half of the total input intensity.  
149 (c) Transmittance  $T$  for CW encircling versus propagation distance  $L$  (top, 50 – 250 mm) and the  
150 maximum coupling coefficient  $\kappa_{max}$  (bottom, 0 – 1.5 mm<sup>-1</sup>). Here,  $T_{mn}$  denotes the transmittance  
151 from input WG $n$  to output WG $m$ . Specifically, WG(1+5) labels the condition of equal intensity  
152 distribution in WG1 and WG5. The chiral transmission efficiency  $T_{3(1+5)}$  (maximum transmittance)  
153 increases with both  $z$  and  $\kappa_{max}$ .

154

#### 155 **Section IV: Optical field evolution in a practical EL encircling waveguide structure**

156 In our experiment, we use the FLDW to fabricate 3D optical waveguide structures inside glass to  
157 realize the dynamic encircling process. The entire EL encircling waveguide structure is embedded  
158 inside glass, making it challenging to monitor the light intensity evolution in individual waveguides  
159 directly and in real time. In this section, we utilize the Beam Propagation Method (BPM) to  
160 demonstrate the evolution of the mode fields within the five-waveguide EL encircling structure (Fig.  
161 S8), with parameters set to ensure single-mode propagation at 785 nm. The simulation encompasses  
162 the entire five-waveguide structure, including the auxiliary region and the EL encircling region. For  
163 the CW encircling direction, the five-waveguide system consistently outputs through WG3  
164 regardless of input state, functioning as an optical combiner. In the CCW process, the system  
165 distributes the output almost equally between WG1 and WG5, regardless of the input port, thereby  
166 functioning as a beam splitter. For cases with intense oscillations during evolution (such as when  
167 WG3 is excited under CW encircling), a significant portion of energy is dissipated through the lossy  
168 waveguides (WG2 and WG4), leading to very low output intensity. By normalizing the intensity  
169 distribution within each waveguide at every position, we can more clearly observe the oscillation  
170 process, as illustrated in the inset.

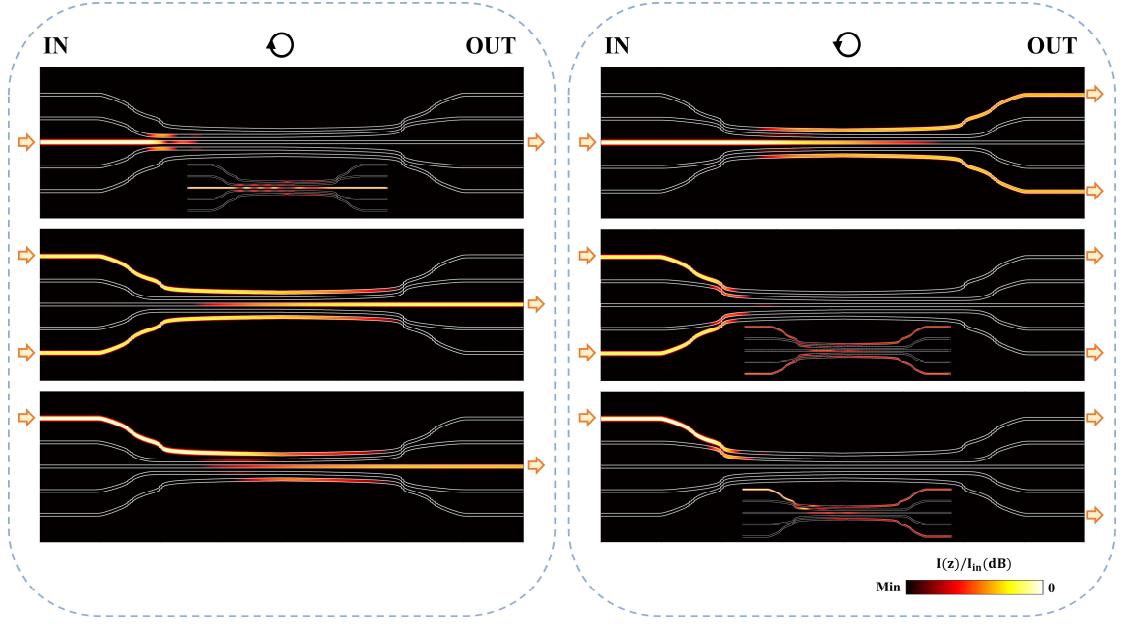

171

172 FIG. S8 Optical field evolution within the five-waveguide EL encircling structure of chiral LDSS for  
 173 CW and CCW encircling processes via the Beam Propagation Method.

174

### 175 Section V: Realization of the $(N, k) = (5, 3)$ case using a nine-waveguide system

176 Here, we demonstrate the equivalence of the  $(N, k) = (5, 3)$  case using a nine-waveguide  
 177 system. The Hamiltonian of the nine-waveguide system is:

$$178 \quad H_{9WG} = \begin{bmatrix} 0 & \kappa_1 & 0 & 0 & 0 & 0 & 0 & 0 & 0 \\ \kappa_1 & i\gamma & \kappa_1 & 0 & 0 & 0 & 0 & 0 & 0 \\ 0 & \kappa_1 & 0 & \kappa_1 & 0 & 0 & 0 & 0 & 0 \\ 0 & 0 & \kappa_1 & i\gamma & \kappa_2 & 0 & 0 & 0 & 0 \\ 0 & 0 & 0 & \kappa_2 & \beta & \kappa_2 & 0 & 0 & 0 \\ 0 & 0 & 0 & 0 & \kappa_2 & i\gamma & \kappa_1 & 0 & 0 \\ 0 & 0 & 0 & 0 & 0 & \kappa_1 & 0 & \kappa_1 & 0 \\ 0 & 0 & 0 & 0 & 0 & 0 & \kappa_1 & i\gamma & \kappa_1 \\ 0 & 0 & 0 & 0 & 0 & 0 & 0 & \kappa_1 & 0 \end{bmatrix}.$$

179 Following the adiabatic elimination method outlined in Sec. III, we obtain the effective Hamiltonian:

$$180 \quad H_e = \begin{bmatrix} i\gamma_z & i\gamma_z & 0 & 0 & 0 \\ i\gamma_z & i\gamma_z & ij & 0 & 0 \\ 0 & ij & \beta + i\gamma_q & ij & 0 \\ 0 & 0 & ij & i\gamma_z & i\gamma_z \\ 0 & 0 & 0 & i\gamma_z & i\gamma_z \end{bmatrix}.$$

181 Although  $H_e$  is not identical to the Hamiltonian of the target  $(N, k) = (5, 3)$  system, we  
 182 demonstrate that the same chiral LDSS can be achieved by choosing an appropriate encircling  
 183 trajectory in the  $J - \gamma_q$  parameter space. The corresponding simulation results are presented in Fig.  
 184 S9.

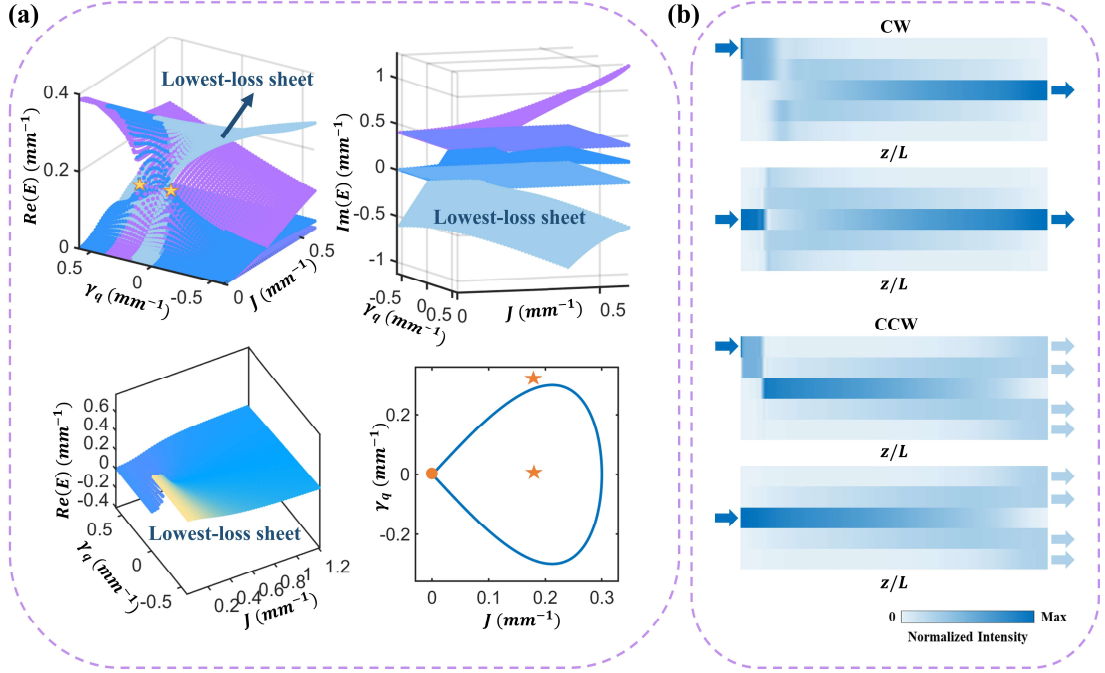

185

186 FIG. S9 Simulation results based on  $H_e$ . (a) Top: Real and imaginary parts of the energy surfaces in  
 187 the  $J - \gamma_q$  parameter space. Bottom: Calculated  $IPR$  of the eigenstates on the lowest-loss energy  
 188 surface and the chosen encircling trajectory. The starting point (orange circle) is at  $\gamma_q = 0$ ,  $J =$   
 189  $0.0001 \text{ mm}^{-1}$ . Fully localized states on this surface exist only for  $\gamma_q \leq 0$ . The trajectory encircles the  
 190 EP on the lowest-loss surface. (b) CW/CCW encircling dynamics (normalized intensity) for different  
 191 initial excitations.

192

193 In a practical waveguide structure, we set the detuning between all sites to zero. The Hamiltonian  
 194 of the resulting nine-waveguide system is:

$$195 \quad H_{9W}(z) = \begin{bmatrix} 0 & \kappa_1(z) & 0 & 0 & 0 & 0 & 0 & 0 & 0 \\ \kappa_1(z) & i\gamma & \kappa_1(z) & 0 & 0 & 0 & 0 & 0 & 0 \\ 0 & \kappa_1(z) & 0 & \kappa_1(z) & 0 & 0 & 0 & 0 & 0 \\ 0 & 0 & \kappa_1(z) & i\gamma & \kappa_2(z) & 0 & 0 & 0 & 0 \\ 0 & 0 & 0 & \kappa_2(z) & 0 & \kappa_2(z) & 0 & 0 & 0 \\ 0 & 0 & 0 & 0 & \kappa_2(z) & i\gamma & \kappa_1(z) & 0 & 0 \\ 0 & 0 & 0 & 0 & 0 & \kappa_1(z) & 0 & \kappa_1(z) & 0 \\ 0 & 0 & 0 & 0 & 0 & 0 & \kappa_1(z) & i\gamma & \kappa_1(z) \\ 0 & 0 & 0 & 0 & 0 & 0 & 0 & \kappa_1(z) & 0 \end{bmatrix}.$$

196 The evolution of the mode fields in this nine-waveguide EL encircling structure is simulated using  
 197 the BPM (see Fig. S10). The corresponding encircling trajectory in the EL encircling region is  
 198 shown in the inset. The maximum coupling coefficient  $\kappa_{max} = 0.8 \text{ mm}^{-1}$ , and the total device  
 199 length is  $L = 120 \text{ mm}$ .

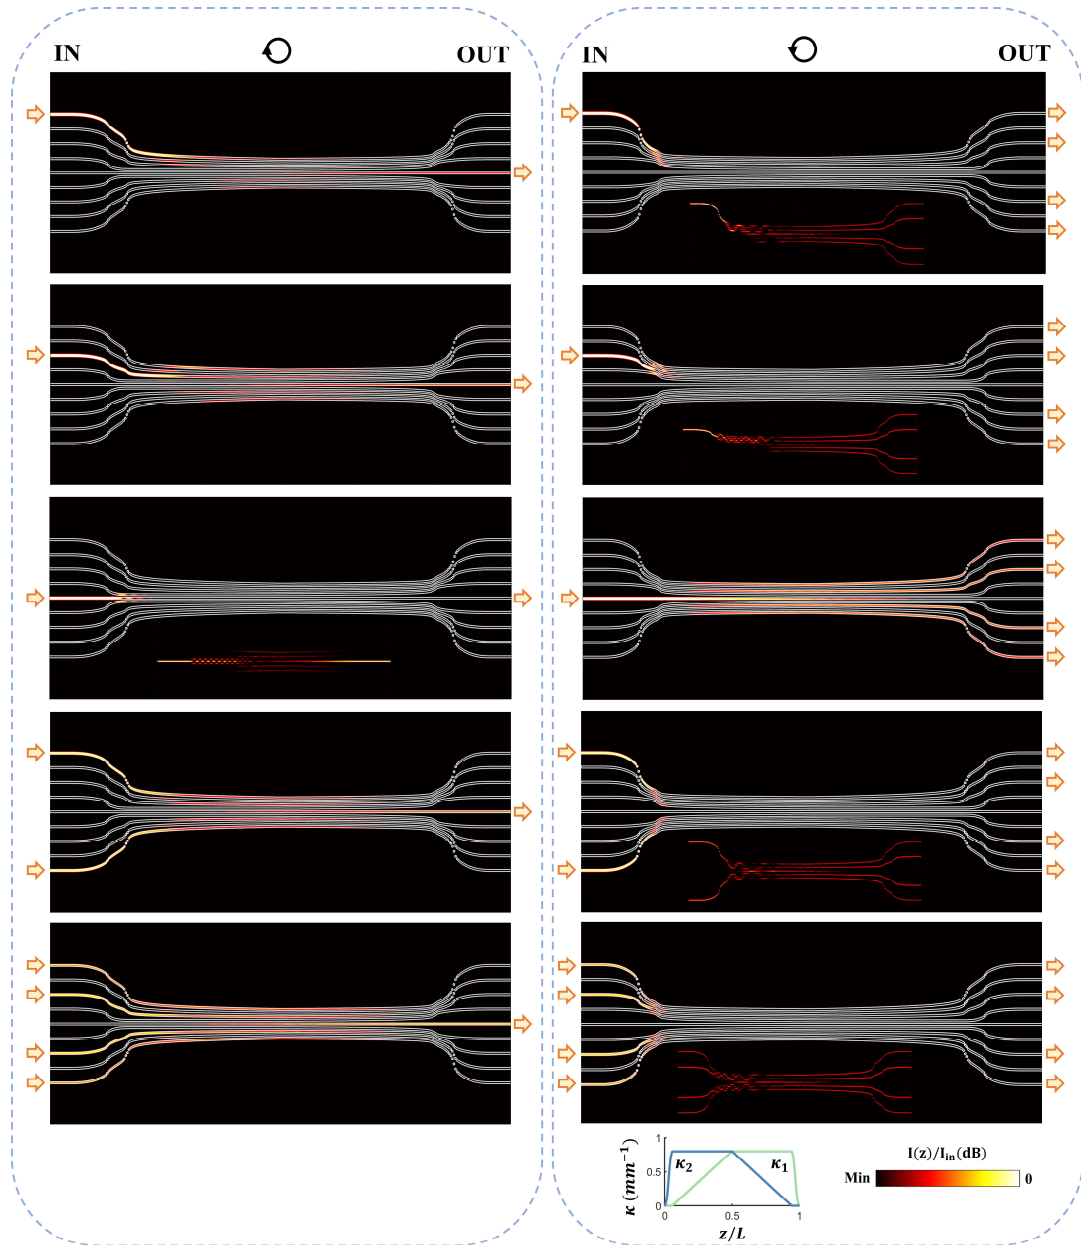

200

201 FIG. S10 Optical field evolution within the nine-waveguide EL encircling structure of chiral LDSS for

202 CW and CCW encircling processes via the Beam Propagation Method.

203

## 204 Section VI: Discussion of the efficiency discrepancy between simulation and experiment

205 The experimentally measured transmission efficiency is generally lower than that predicted in

206 simulation, mainly due to fabrication-related imperfections in the implementation of loss. In our

207 experiment, the loss is introduced by writing scatterers along the propagation direction, which is

208 relatively time-consuming during fabrication. As a result, unavoidable slight positional drifts

209 accumulate over the writing process, leading to deviations in the actual loss from the designed value

210 and consequently reducing the overall transmission efficiency. In addition, because the loss is

211 realized through discrete scatterers with a spacing of 100  $\mu\text{m}$ , the propagating light does not  
212 experience an ideally uniform loss throughout the dynamical evolution. This discrete  
213 implementation may further contribute to the discrepancy between experimental and simulated  
214 transmission efficiencies. These nonideal factors mainly affect the absolute transmission efficiency,  
215 but do not modify the physical mechanism demonstrated here or compromise the validity of our  
216 main conclusions. We expect that, with more precise control over the fabricated loss profile, the  
217 transmission efficiency can be further improved.

218

### 219 **Section VII: Robustness against the deviation of $\kappa$ and $\gamma$**

220 Here, we display the state conversion outcomes of 50 evolution processes in the five-waveguide  
221 EL encircling system for different excitation conditions to confirm the robustness of the system  
222 against perturbations in  $\kappa$  and  $\gamma$ . Random perturbations within  $\pm 0.2 \text{ mm}^{-1}$  for  $\kappa$  ( $\kappa_1, \kappa_2$ ) and  
223  $\gamma$  are added at each evolution step of every conversion process. For the CW encircling processes  
224 (see Fig. S11(a)), the system consistently outputs through WG3 regardless of input state. For the  
225 CCW encircling processes (see Fig. S11(b)), the output is distributed almost equally between WG1  
226 and WG5, also independent of the input. Although output intensity fluctuations increase in processes  
227 involving NATs, mode crosstalk remains negligible.

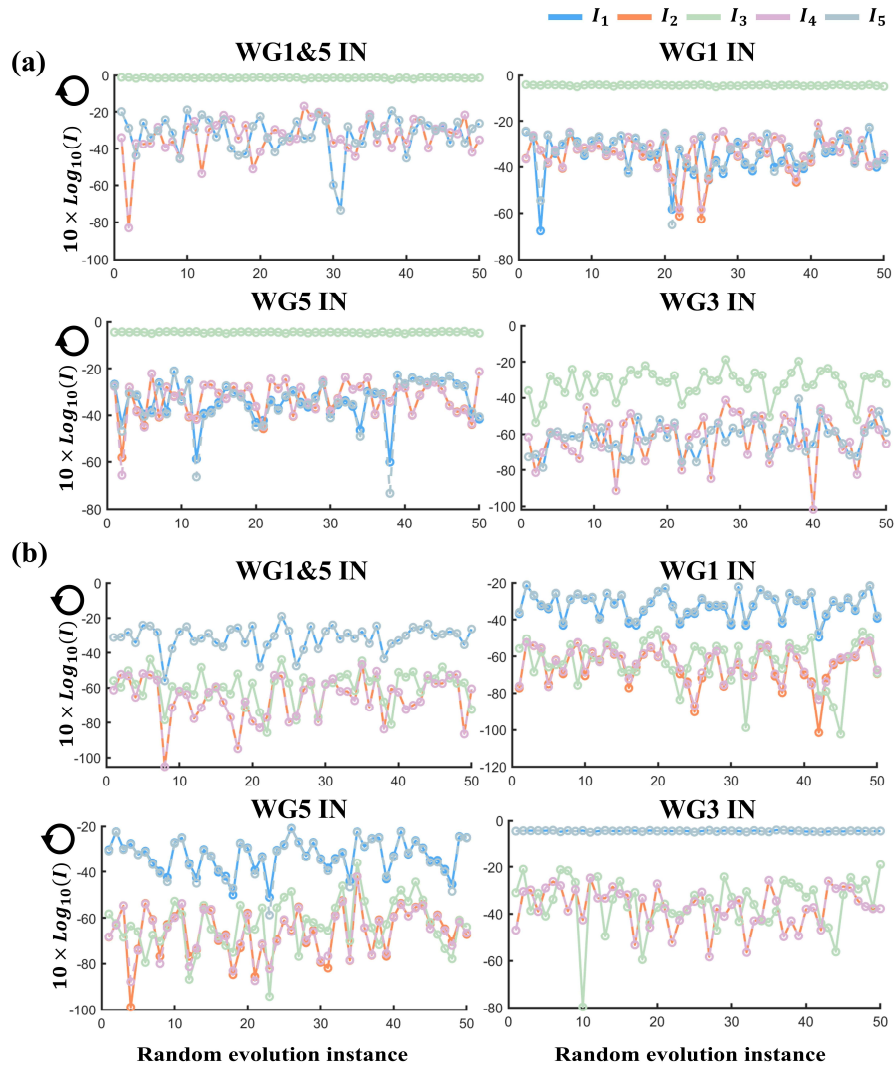

228

229 FIG. S11 Robustness of chiral LDSS in the five-waveguide EL encircling system. (a), (b) State  
 230 conversion outcomes from 50 evolution processes with different excitation conditions for (a) CW and (b)  
 231 CCW encircling directions. Random perturbations within  $\pm 0.2 \text{ mm}^{-1}$  were applied to  $\kappa_1$ ,  $\kappa_2$  and  $\gamma$   
 232 at each evolution step.

233

234

235

236 **Reference:**

237 1 Yang, F., Liu, Y. C. & You, L. Anti-PT symmetry in dissipatively coupled optical systems.

238 *Phys. Rev. A* **96**, 053845 (2017).
